# Supplementary material for: In Vitro Screening for Probiotic Properties of Lactobacillus and Bifidobacterium Strains in Assays Relevant for Non-Alcoholic Fatty Liver Disease Prevention
Source: MDPI journal article supplement (doi:10.3390/nu15102361), 2023-05-18
Supplement: s1 [file s1]

## Supplementary figures and tables

Sup. Figure S1: Flow chart of the *in vitro* screening pipeline.

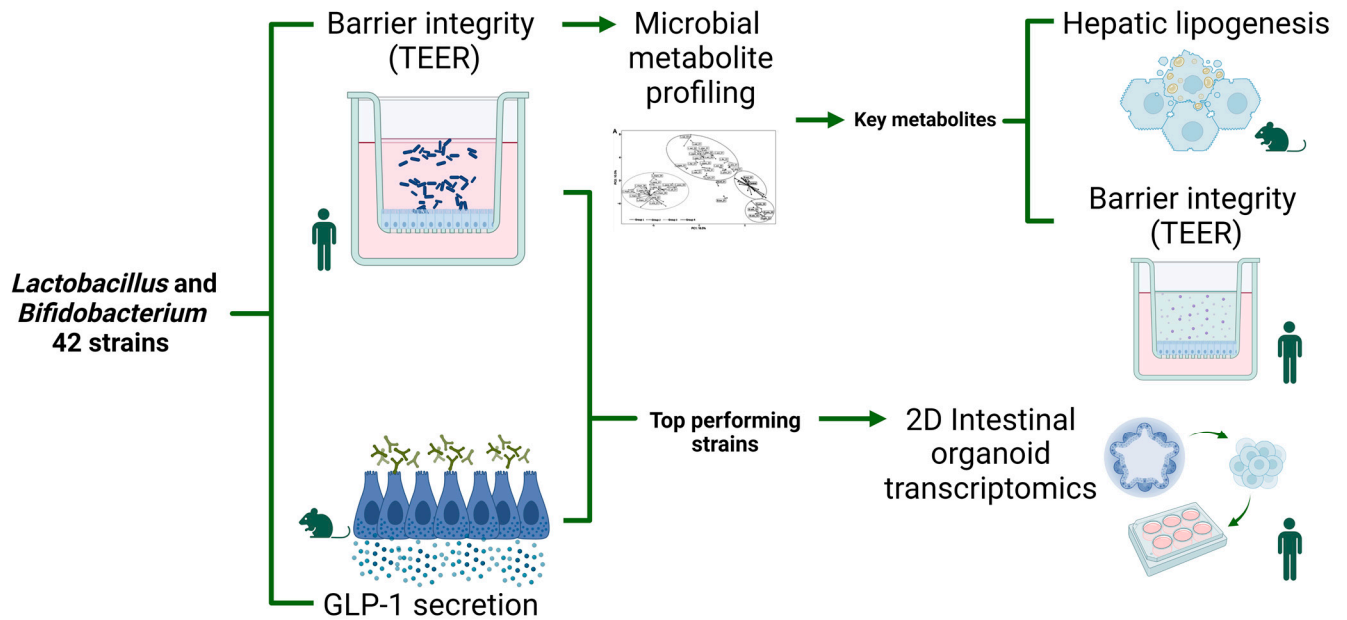

**Sup. Figure S1: Flow chart of the *in vitro* screening pipeline.** To enable the finding of possible candidate probiotic strains for improved metabolic health such as liver health, a library of 42 strains from *Lactobacillus* and *Bifidobacterium* genus were screened. Barrier integrity were evaluated by measuring TEER in Caco-2 cells and activation of GLP-1 secretion were measured from STC-1 cell line. Microbial-derived metabolites from spent media were profiled from all 42 strains and key metabolites were identified. Key metabolites were tested for beneficial effects in primary murine hepatocytes and with relation to TEER with Caco-2 cells. The six strains that collectively performed the best in TEER and GLP-1 secretion assay was further screened in relation to intestinal epithelial transcriptional changes using 2D human small intestinal-derived organoids.

Sup. Table S1: Bacteria strain library

| Strain(Genus, Species, Subspecies) |                     |                   | DSM number | Trademark         | ID Code   |
|------------------------------------|---------------------|-------------------|------------|-------------------|-----------|
| <i>Lactocaseibacillus</i>          | <i>rhamnosus</i>    |                   | DSM33156   | LGG®              | L.rham_01 |
| <i>Lactocaseibacillus</i>          | <i>rhamnosus</i>    |                   |            | NA                | L.rham_02 |
| <i>Lactocaseibacillus</i>          | <i>rhamnosus</i>    |                   |            | NA                | L.rham_03 |
| <i>Lactocaseibacillus</i>          | <i>rhamnosus</i>    |                   |            | NA                | L.rham_04 |
| <i>Lactocaseibacillus</i>          | <i>rhamnosus</i>    |                   |            | NA                | L.rham_05 |
| <i>Lactobacillus</i>               | <i>rhamnosus</i>    |                   | DSM33426   | GR-1®             | L.rham_06 |
| <i>Lactobacillus</i>               | <i>paragasseri</i>  |                   |            | NA                | L.pgas_01 |
| <i>Lactobacillus</i>               | <i>paragasseri</i>  |                   |            | NA                | L.pgas_02 |
| <i>Lactobacillus</i>               | <i>paragasseri</i>  |                   |            | NA                | L.pgas_03 |
| <i>Lactobacillus</i>               | <i>gasseri</i>      |                   |            | NA                | L.gas_01  |
| <i>Lactobacillus</i>               | <i>acidophilus</i>  |                   | DSM13241   | LA-5®             | L.aci_01  |
| <i>Lactobacillus</i>               | <i>acidophilus</i>  |                   |            | NA                | L.aci_02  |
| <i>Lactobacillus</i>               | <i>acidophilus</i>  |                   | DSM32754   | LA-2®             | L.aci_03  |
| <i>Lactocaseibacillus</i>          | <i>paracasei</i>    |                   |            | NA                | L.para_01 |
| <i>Lactocaseibacillus</i>          | <i>paracasei</i>    |                   |            | NA                | L.para_02 |
| <i>Lactocaseibacillus</i>          | <i>paracasei</i>    | <i>paracasei</i>  | DSM19465   | L.CASEI 01™       | L.para_03 |
| <i>Lactocaseibacillus</i>          | <i>paracasei</i>    |                   |            | NA                | L.para_04 |
| <i>Lactocaseibacillus</i>          | <i>paracasei</i>    | <i>paracasei</i>  | DSM33451   | L. CASEI 431®     | L.para_05 |
| <i>Lactocaseibacillus</i>          | <i>paracasei</i>    |                   |            | NA                | L.para_06 |
| <i>Ligilactobacillus</i>           | <i>salivarius</i>   |                   |            | NA                | L.sal_01  |
| <i>Ligilactobacillus</i>           | <i>salivarius</i>   |                   |            | NA                | L.sal_02  |
| <i>Ligilactobacillus</i>           | <i>salivarius</i>   | <i>salivarius</i> | DSM33820   | NA                | L.sal_03  |
| <i>Lactobacillus</i>               | <i>crispatus</i>    |                   |            | NA                | L.cris_01 |
| <i>Companilactobacillus</i>        | <i>alimentarius</i> |                   |            | NA                | L.ali_01  |
| <i>Lactobacillus</i>               | <i>jensenii</i>     |                   |            | NA                | L.jen_01  |
| <i>Latilactobacillus</i>           | <i>sakei</i>        |                   |            | NA                | L.sak_01  |
| <i>Companilactobacillus</i>        | <i>faracinis</i>    |                   |            | NA                | L.far_01  |
| <i>Lactobacillus</i>               | <i>plantarum</i>    |                   |            | NA                | L.plan_01 |
| <i>Lactobacillus</i>               | <i>plantarum</i>    |                   |            | NA                | L.plan_02 |
| <i>Ligilactobacillus</i>           | <i>ruminis</i>      |                   |            | NA                | L.rum_01  |
| <i>Lactobacillus</i>               | <i>kalixensis</i>   |                   |            | NA                | L.kal_01  |
| <i>Levilactobacillus</i>           | <i>brevis</i>       |                   |            | NA                | L.bre_01  |
| <i>Lactobacillus</i>               | <i>johnsonii</i>    |                   |            | NA                | L.john_01 |
| <i>Limosilactobacillus</i>         | <i>fermentum</i>    |                   |            | NA                | L.fer_01  |
| <i>Bifidobacterium</i>             | <i>longum</i>       | <i>longum</i>     | DSM15955   | NA                | B.lon_01  |
| <i>Bifidobacterium</i>             | <i>adolescentis</i> |                   |            | NA                | B.ado_01  |
| <i>Bifidobacterium</i>             | <i>adolescentis</i> |                   |            | NA                | B.ado_02  |
| <i>Bifidobacterium</i>             | <i>adolescentis</i> |                   |            | NA                | B.ado_03  |
| <i>Bifidobacterium</i>             | <i>adolescentis</i> |                   |            | NA                | B.ado_04  |
| <i>Bifidobacterium</i>             | <i>adolescentis</i> |                   |            | NA                | B.ado_05  |
| <i>Bifidobacterium</i>             | <i>longum</i>       | <i>infantis</i>   | DSM33361   | Bifin02, ISTILOS™ | B.inf_01  |
| <i>Bifidobacterium</i>             | <i>animalis</i>     | <i>lactis</i>     | DSM15954   | BB-12™            | B.ani_01  |

LGG®, GR-1®, LA-5®, LA-2®, L.CASEI 01™, L.CASEI 431®, ISTILOS™ and BB-12™ are trademarks of Chr. Hansen A/S.

Sup. Table S2: Metabolites tested in TEER

| Metabolite                              | Concentration (μM)    | Product ID   |
|-----------------------------------------|-----------------------|--------------|
| DL-Indole-3 lactic acid                 | 4180; 418; 41.8; 4.18 | Sigma I5508  |
| Choline chloride                        | 600; 60; 6            | Sigma C7017  |
| (S)-(-)-2-Hydroxyisocaproic acid (HI-A) | 3930; 393; 39.3       | Sigma 219827 |
| cis-5,8,11,14,17-Eicosapentaenoic acid  | 20; 2; 0.2            | Sigma 44864  |

Sup. Figure S2: Transepithelial electrical resistance (TEER) assay upon stimulation with bacteria.

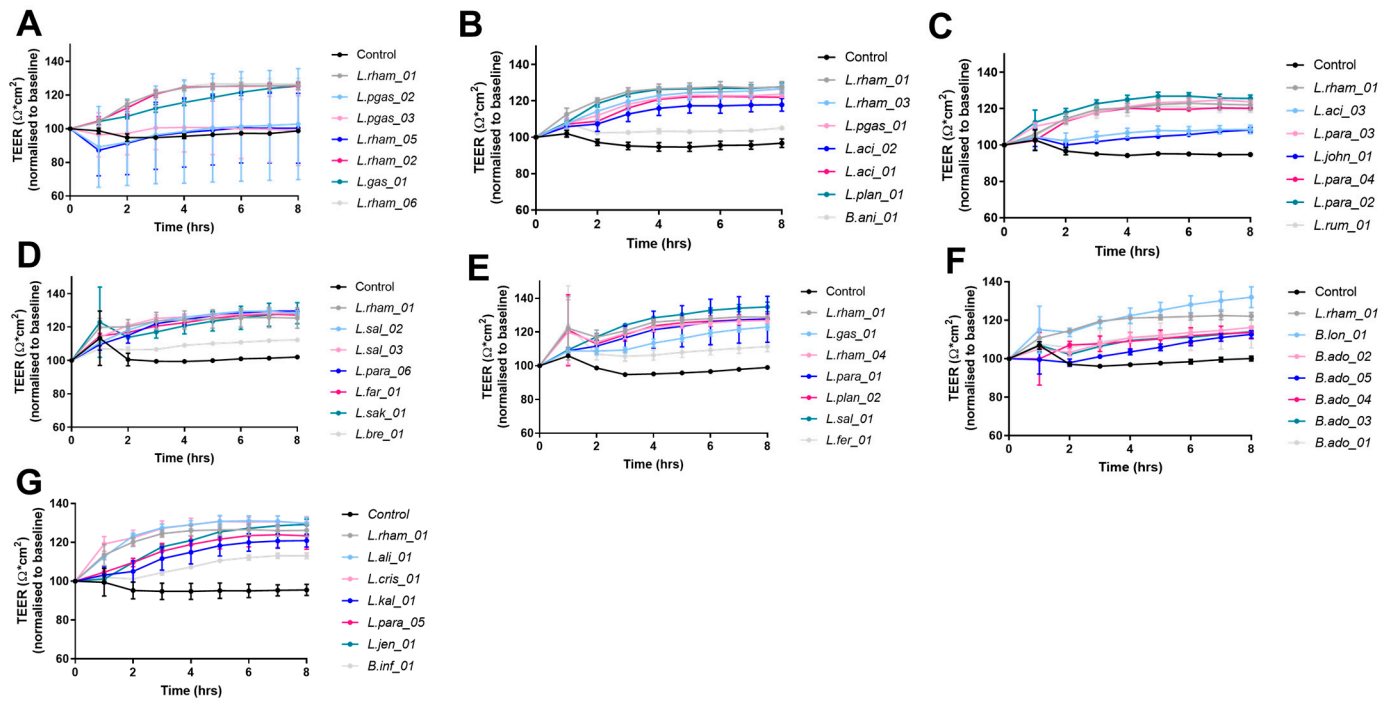

Sup. Figure S2) Transepithelial electrical resistance (TEER) assay upon stimulation with bacteria. A-G) TEER normalized to baseline t=0 set as 100% barrier integrity with 8 hrs. in co-culture with viable bacteria. DMEM = AB-free as the negative control and L.rham\_01 as positive control. Co-cultures were tested in triplicates (n=3) and error bars indicate SD.

Sup. Table S3: 2D human intestinal organoid monolayer cell types

| Intestinal cell types in 2D monolayer cultures |           |                                                             |           |       |           |       |
|------------------------------------------------|-----------|-------------------------------------------------------------|-----------|-------|-----------|-------|
| Cell type                                      | Gene name |                                                             | Control A | SD    | Control B | SD    |
| Enterocyte                                     | EPCAM     | Epithelial cell adhesion molecule                           | 4288,4    | 61,8  | 3262,5    | 85,4  |
|                                                | ALPI      | Alkaline Phosphatase                                        | 149,3     | 1,7   | 55,3      | 7,7   |
|                                                | CDH1      | E-cadherin 1                                                | 473,1     | 23,8  | 401,7     | 66,0  |
|                                                | KRT20     | Keratin 20                                                  | 2118,0    | 85,2  | 1567,2    | 120,2 |
| Stem cell/proliferation                        | MKI67     | Marker Of Proliferation Ki-67                               | 5,2       | 0,2   | 5,6       | 1,2   |
|                                                | LGR5      | Leucine Rich Repeat Containing G Protein-Coupled Receptor 5 | 0,6       | 0,1   | 0,6       | 0,0   |
|                                                | BMI1      | BMI1 Proto-Oncogene                                         | 11,7      | 0,4   | 12,9      | 0,5   |
| Goblet cell                                    | MUC1      | Mucin 1                                                     | 1284,5    | 7,7   | 1032,7    | 82,6  |
|                                                | MUC2      | Mucin 2                                                     | 2,2       | 0,2   | 2,6       | 0,6   |
|                                                | MUC5B     | Mucin 5B                                                    | 11,2      | 1,7   | 2,9       | 0,8   |
|                                                | MUC13     | Mucin 13                                                    | 5538,3    | 112,0 | 3271,5    | 292,9 |
|                                                | TFF3      | Trefoil factor 3                                            | 2445,5    | 49,2  | 2711,2    | 69,7  |
| Paneth cell                                    | LYZ       | Lysozyme                                                    | 3272,9    | 70,9  | 2753,6    | 151,2 |
|                                                | CD24      | CD24 Molecule                                               | 948,3     | 42,0  | 951,6     | 74,5  |
|                                                | MMP7      | Matrix Metalloproteinase 7                                  | 501,5     | 27,2  | 1039,2    | 40,6  |
| Enteroendocrine cell                           | CHGA      | Chromogranin A                                              | 0,2       | 0,0   | 0,1       | 0,0   |
|                                                | CCK       | Cholecystekinin                                             | 0,7       | 0,1   | 2,6       | 0,5   |
|                                                | SCT       | Secretin                                                    | 2,6       | 0,8   | 0,9       | 0,1   |
|                                                | REG4      | Regenerating islet-derived protein 4                        | 7,8       | 0,9   | 56,1      | 4,4   |
|                                                | NTS       | Neurotensin                                                 | 4,3       | 0,1   | 2,5       | 0,5   |
| Crypt marker                                   | CD44      | CD44 Molecule                                               | 18,8      | 0,7   | 34,5      | 1,4   |
| Villus marker                                  | VIL1      | Villin1                                                     | 314,3     | 12,0  | 221,2     | 20,3  |
| Tight junctions                                | TJP1      | Zonula occludens 1                                          | 51,2      | 1,1   | 50,4      | 6,8   |
|                                                | TJP2      | Zonula occludens 2                                          | 59,5      | 1,3   | 49,3      | 3,0   |
|                                                | CLDN3     | Claudin 3                                                   | 1292,4    | 56,6  | 1187,7    | 26,2  |
|                                                | CLDN4     | Claudin 4                                                   | 1034,6    | 15,9  | 1117,6    | 72,6  |
|                                                | CLDN7     | Claudin 7                                                   | 1588,7    | 59,2  | 1229,2    | 91,0  |
|                                                | OCLN      | Occludin                                                    | 63,8      | 3,1   | 48,5      | 7,1   |
| Transmembrane sensors                          | FFAR4     | Free fatty acid receptor 4                                  | 4,5       | 0,2   | 10,0      | 0,5   |
|                                                | TLR1      | Toll-like receptor 1                                        | 2,0       | 0,1   | 1,5       | 0,1   |
|                                                | TLR2      | Toll-like receptor 2                                        | 2,5       | 0,1   | 1,8       | 0,0   |
|                                                | TLR3      | Toll-like receptor 3                                        | 24,6      | 1,1   | 15,1      | 3,0   |
|                                                | GPRC5A    | G protein-coupled receptor 5A                               | 640,0     | 12,7  | 874,6     | 61,7  |
|                                                | GPR35     | G protein-coupled receptor 35                               | 72,0      | 2,5   | 49,6      | 2,2   |
| Immune response                                | CXCL1     | Interleukin-1                                               | 68,6      | 3,3   | 207,1     | 2,7   |
|                                                | CXCL3     | Interleukin-3                                               | 23,3      | 2,1   | 86,7      | 5,0   |
|                                                | CXCL8     | Interleukin-8                                               | 35,7      | 2,4   | 188,3     | 8,3   |

Values represent mean Transcripts Per Million (TPM) from the DESeq analysis (n=3).

Sup. Figure S3: Gene ontology analysis (GO) Lactobacilli strains.

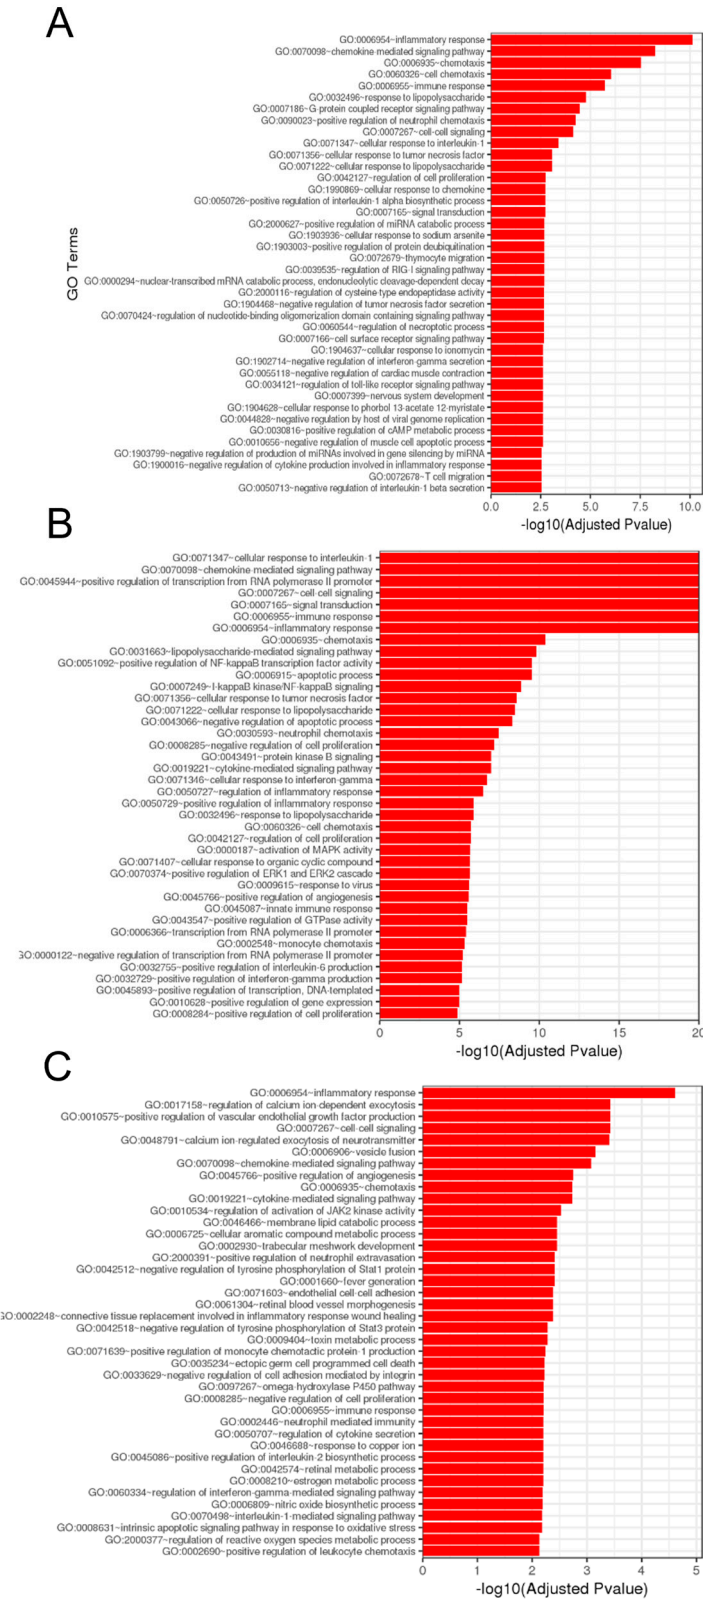

Sup. Figure S3. Gene ontology analysis (GO) Lactobacilli strains. A) L.rham\_01, B) L.kal\_01 and C) L.jen\_01.

Sup. Table S4. Highly produced metabolites

|    | Metabolites                                       | L.rham_01 | L.para_01 | L.kal_01 | L.jen_01 | B.lon_01 | B.ado_03 |
|----|---------------------------------------------------|-----------|-----------|----------|----------|----------|----------|
| 1  | 2-(methylsulfonyl)-1,2,3,4-tetrahydroisoquinoline | 35,24     | 1,20      | 3,95     | 11,00    | 26,91    | 0,78     |
| 2  | 2,3,4,5-tetrahydrodipicolinic acid                | 6,43      | 1,61      | 3,00     | 10,74    | 2,55     | 13,81    |
| 3  | 2-aminobutyric acid                               | 0,95      | 1,13      | 0,88     | 1,15     | 0,91     | 8,81     |
| 4  | 3-Methyladenine                                   | 32,50     | 39,00     | 780,13   | 773,13   | 1,79     | 5,40     |
| 5  | 3-Methylxanthine                                  | 1,64      | 2,50      | 5,04     | 5,57     | 1,04     | 2,29     |
| 6  | 3-Phenyllactic acid                               | 76,94     | 91,66     | 187,92   | 1,32     | 16,80    | 1,07     |
| 7  | 4-Indolecarbaldehyde                              | 1,85      | 2,61      | 6,07     | 1,78     | 8,80     | 8,86     |
| 8  | 4-Piperidinecarboxamide                           | 5,08      | 6,53      | 1,26     | 1,25     | 1,19     | 1,15     |
| 9  | 4-Vinylphenol                                     | 77,17     | 91,53     | 187,18   | 1,30     | 16,87    | 1,07     |
| 10 | 6-Methyl[1,2,4]triazolo[4,3-b]pyridazin-8-ol      | 3,10      | 12,09     | 94,82    | 100,46   | 0,56     | 1,72     |
| 11 | 7-Methylguanine                                   | 2,74      | 4,86      | 13,77    | 21,51    | 2,36     | 2,55     |
| 12 | Acetylarginine                                    | 0,97      | 0,91      | 4,82     | 1,06     | 7,54     | 6,68     |
| 13 | Acetylmuramic acid                                | 6,74      | 0,31      | 23,66    | 19,04    | 0,39     | 5,03     |
| 14 | alpha-Hydroxyisovaleric acid                      | 8,67      | 11,55     | 8,24     | 1,47     | 0,74     | 0,80     |
| 15 | Carbamoylaspartate                                | 8,99      | 588,87    | 0,85     | 1,16     | 2,05     | 2,50     |
| 16 | Cytidine                                          | 0,95      | 1,59      | 0,53     | 1,00     | 1,45     | 6,22     |
| 17 | Deoxyinosine                                      | 1,32      | 1,31      | 5,40     | 6,14     | 0,85     | 1,90     |
| 18 | DL-4-Hydroxyphenyllactic acid                     | 4,60      | 10,56     | 9,04     | 0,91     | 3,99     | 0,88     |
| 19 | D-α-Hydroxyglutaric acid                          | 5,94      | 19,77     | 23,15    | 1,45     | 9,93     | 4,04     |
| 20 | Furfural                                          | 85,61     | 63,42     | 6,42     | 0,79     | 2,19     | 0,93     |
| 21 | Guanine                                           | 5,87      | 0,12      | 8,53     | 5,32     | 1,60     | 11,53    |
| 22 | Hexanoylglycine                                   | 116,11    | 12,11     | 11,86    | 2,50     | 3,89     | 2,19     |
| 23 | Hydroxyisocaproic acid                            | 197,51    | 275,82    | 151,72   | 30,11    | 6,84     | 2,15     |
| 24 | Indole-3-acetaldehyde                             | 1,87      | 4,57      | 5,52     | 0,91     | 97,88    | 1,88     |
| 25 | Indole-3-lactic acid                              | 1,93      | 4,67      | 4,90     | 1,00     | 62,69    | 1,15     |
| 26 | Inosine                                           | 10,77     | 1,67      | 3,98     | 0,58     | 3,12     | 0,85     |
| 27 | Isovaleraldehyde                                  | 185,59    | 256,67    | 142,14   | 28,11    | 6,67     | 2,09     |
| 28 | Methionine sulfoxide                              | 1,22      | 1,52      | 2,21     | 7,16     | 1,19     | 1,24     |
| 29 | N-Acetylglutamine                                 | 15,45     | 2,25      | 6,37     | 28,72    | 5,66     | 34,35    |
| 30 | N-acetylglycine                                   | 1,57      | 1,30      | 1,78     | 4,52     | 1,19     | 1,17     |
| 31 | N-Acetylmethionine                                | 11,30     | 7,09      | 8,12     | 7,59     | 14,24    | 8,69     |
| 32 | N-Acetyl-phenylalanine                            | 40,76     | 11,23     | 4,03     | 5,20     | 42,63    | 19,03    |
| 33 | N-Acetyltryptophan                                | 8,83      | 30,15     | 4,00     | 6,69     | 38,03    | 65,06    |
| 34 | N-Acetyltyrosine                                  | 8,91      | 5,71      | 2,33     | 3,09     | 5,06     | 3,84     |
| 35 | N-formylmethionine                                | 1,90      | 3,39      | 8,19     | 1,86     | 1,08     | 1,72     |
| 36 | Nicotinic acid                                    | 408,87    | 1355,83   | 866,30   | 33,08    | 4,33     | 4,67     |
| 37 | Pipecolic acid                                    | 2,23      | 9,68      | 1,12     | 0,88     | 2,44     | 1,13     |
| 38 | Pyridine                                          | 15,29     | 13,82     | 7,41     | 1,07     | 9,13     | 9,08     |
| 39 | Sorbic acid                                       | 97,25     | 5,95      | 3,84     | 1,50     | 0,70     | 0,78     |
| 40 | Thymine                                           | 21,88     | 38,74     | 42,99    | 28,79    | 1,76     | 1,70     |

Values represent the log2 fold change value to the media control without bacteria. (n=3)
